# Supplementary material for: Atomically confined calcium in nitrogen-doped graphene as an efficient heterogeneous catalyst for hydrogen evolution
Source: PubMed Central journal article supplement — iScience. 2021 Jun 15;24(7):102728. doi: 10.1016/j.isci.2021.102728 (PMC8254045; doi:10.1016/j.isci.2021.102728), 2021-06-15
Supplement: mmc1.pdf [file mmc1.pdf]

**iScience, Volume 24**

**Supplemental information**

**Atomically confined calcium in nitrogen-doped  
graphene as an efficient heterogeneous  
catalyst for hydrogen evolution**

**Jie Sun, Suchun Li, Qi Zhao, Cunping Huang, Qiang Wu, Wei Chen, Qunjie Xu, and Weifeng Yao**

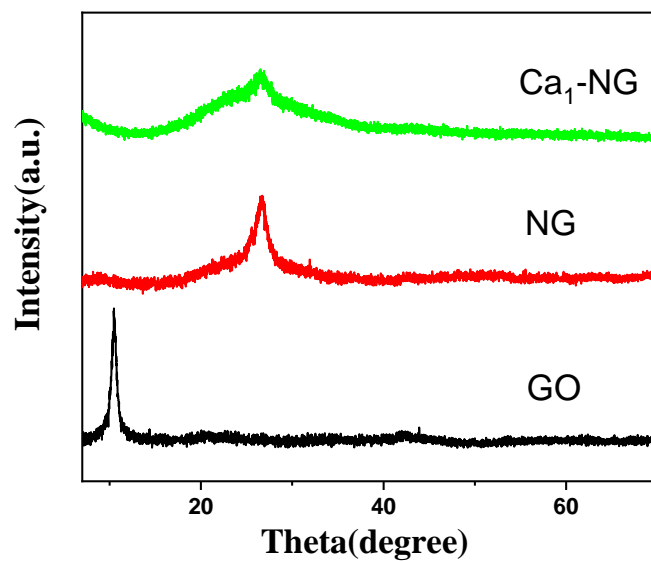

**Figure S1.** Related to Figure 1. XRD patterns of GO, NG and Ca<sub>1</sub>-NG.

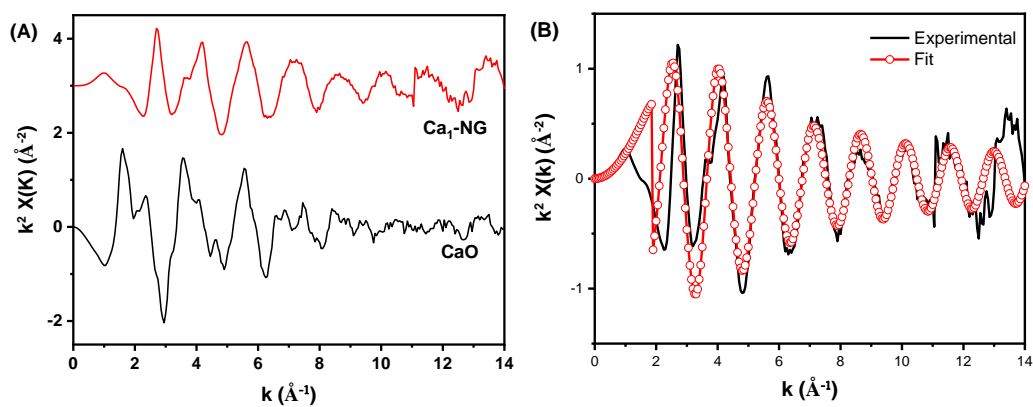

**Figure S2.** Related to Figure 3. Ca K-edge FT-EXAFS spectra of Ca<sub>1</sub>-NG and the reference samples at k-space (A) and the corresponding Ca K-edge EXAFS k-space fitting curves for Ca<sub>1</sub>-NG (B).

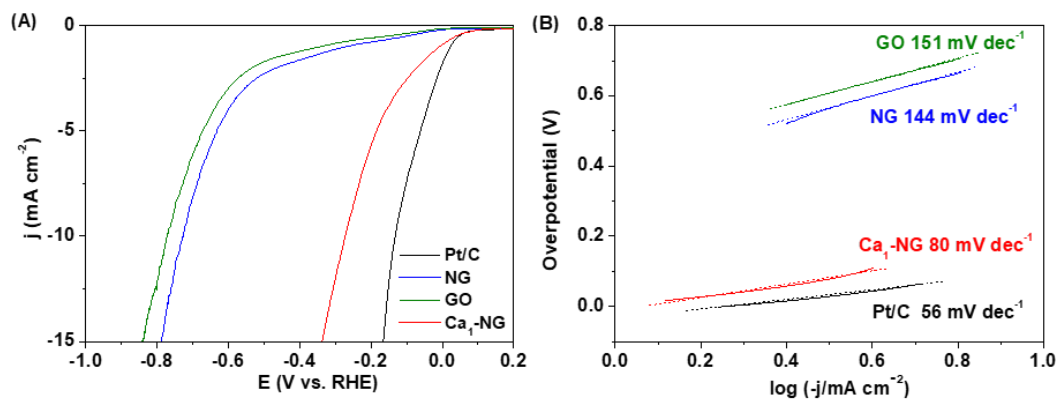

**Figure S3. Related to Figure 4.** (a) Polarization curves and (b) Tafel plots for HER from a 1.0 M (NH<sub>4</sub>)<sub>2</sub>SO<sub>3</sub> solution (pH = 8.0) on the modified GCEs comprised of GO, NG, Ca<sub>1</sub>-NG and commercial Pt/C electrocatalysts with 0.38 mg cm<sup>-2</sup> catalyst loading density.

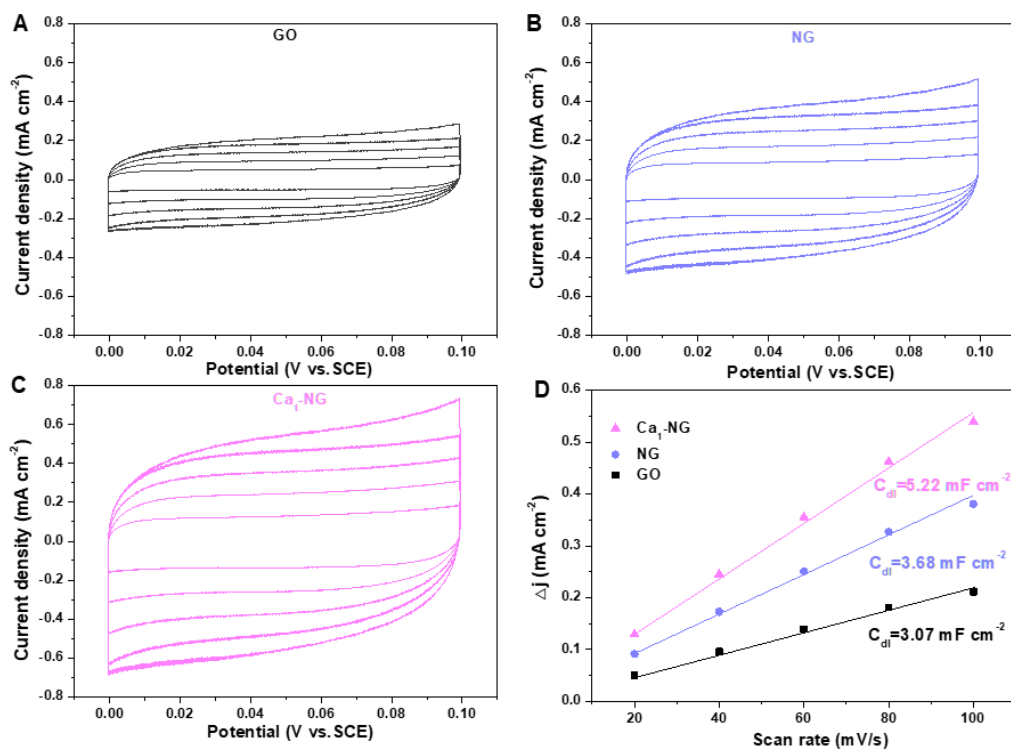

**Figure S4. Related to Figure 4.** Cyclic voltammograms of GO (A), NG (B), and Ca<sub>1</sub>-NG (C) in a 0.5 M H<sub>2</sub>SO<sub>4</sub> solution. The scanning rates are from 20 to 100 mV s<sup>-1</sup> and the potential ranges are from 0.00 - 0.10 V vs RHE. (D) The double-layer capacitances (C<sub>dl</sub>) are calculated by plotting the current density against scan rate to fit a linear regression.  $\Delta j = (j_a - j_c)/2$  is obtained at 50 mV vs. RHE.

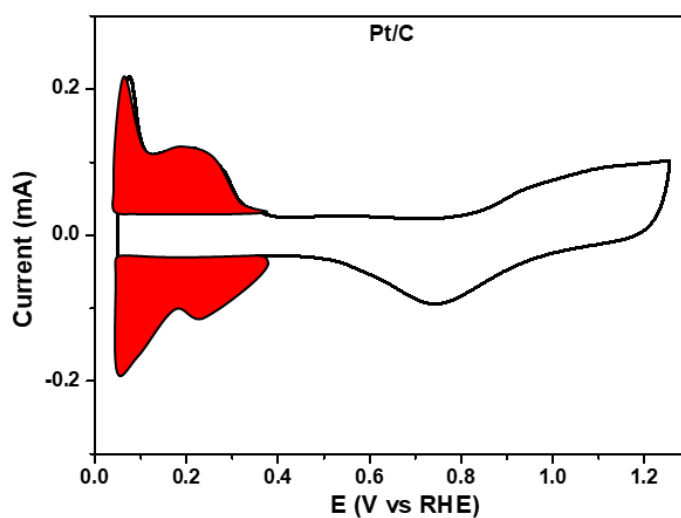

**Figure S5. Related to Figure 4.** Hydrogen adsorption/desorption for measuring the surface area of a 20 wt.% commercial Pt/C catalyst at 20 mV s<sup>-1</sup> in Ar-saturated 0.5 M H<sub>2</sub>SO<sub>4</sub>.

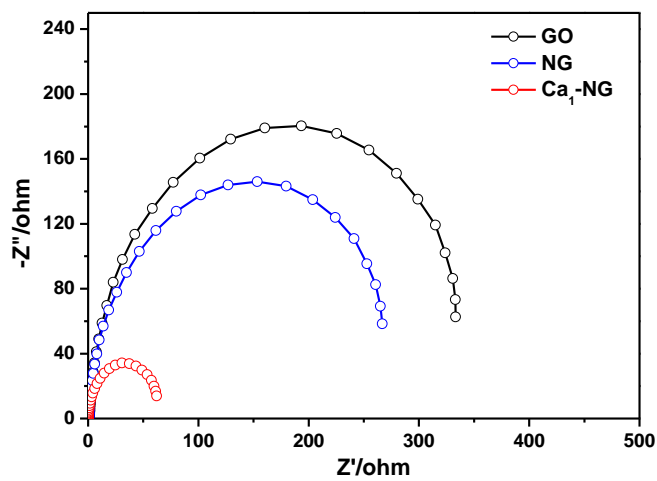

**Figure S6. Related to Figure 4.** Nyquist plots of GO, NG, Ca<sub>1</sub>-NG modified graphite carbon electrodes in a 0.5 M H<sub>2</sub>SO<sub>4</sub> solution.

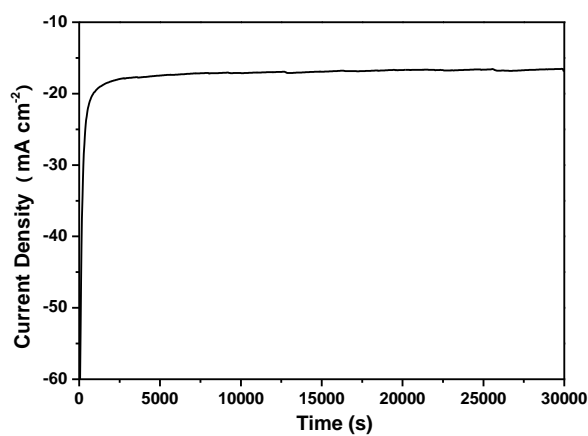

**Figure S7. Related to Figure 4.** Durability i-t curve of Ca<sub>1</sub>-NG at a 200 mV (vs. RHE) constant overpotential.

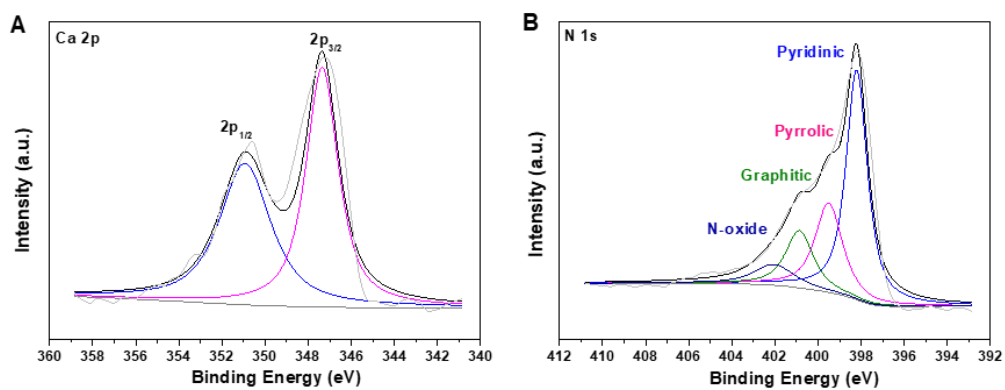

**Figure S8. Related to Figure 2.** (A) Ca 2p and (B) N 1s high-resolution XPS spectra of Ca<sub>1</sub>-NG after the hydrogen evolution reaction.

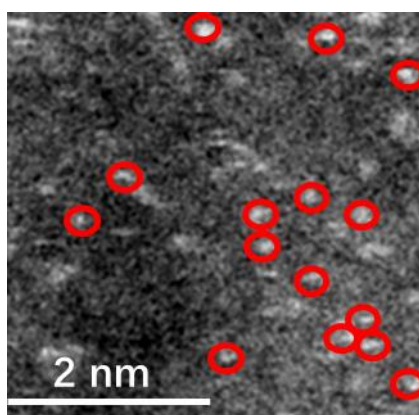

**Figure S9. Related to Figure 1.** HAADF-STEM image of Ca<sub>1</sub>-NG after the hydrogen evolution reaction.

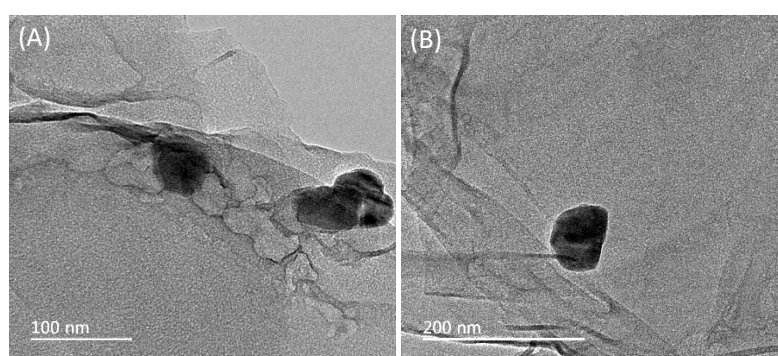

**Figure S10. Related to Figure 1.** TEM images of Ca<sub>1</sub>-NG/CdS before (A) and after (B) the photocatalytic hydrogen reactions.

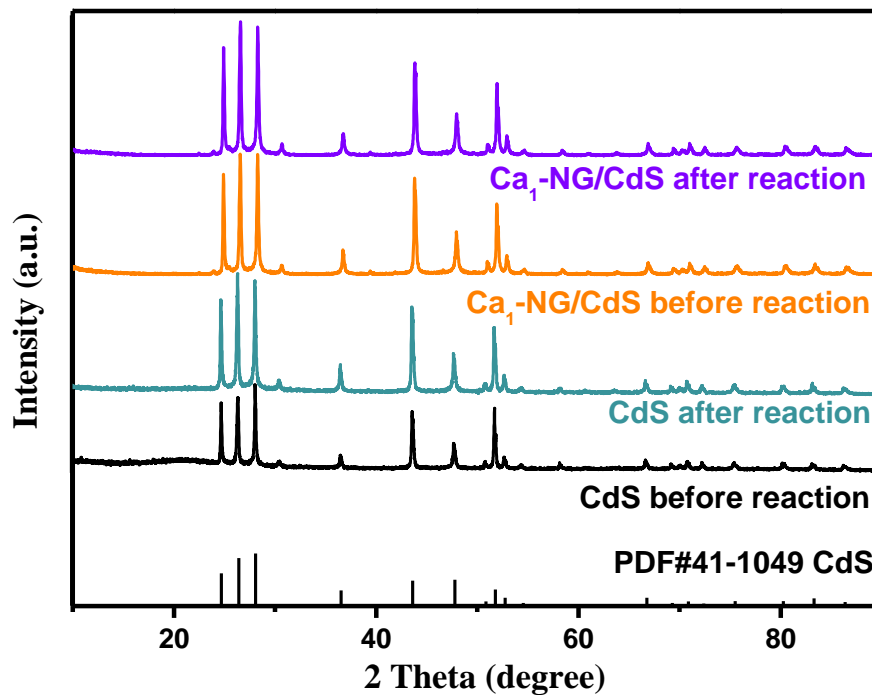

**Figure S11.** Related to Figure 1. XRD patterns of CdS and 0.5 wt.% Ca<sub>1</sub>-NG/CdS before and after the photocatalytic hydrogen evolution reaction.

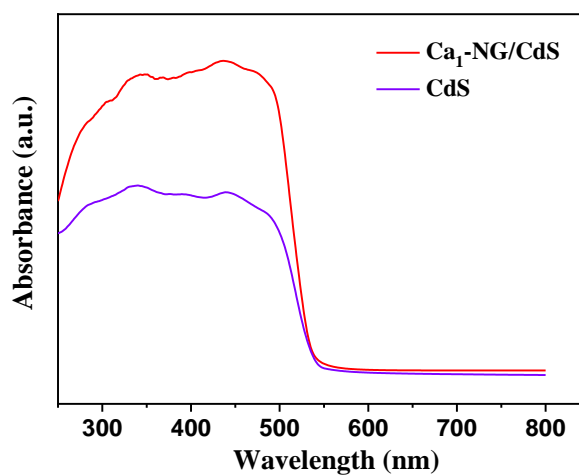

**Figure S12.** Related to Figure 5. UV-visible absorption spectra of CdS and 0.5 wt.% Ca<sub>1</sub>-NG/CdS.

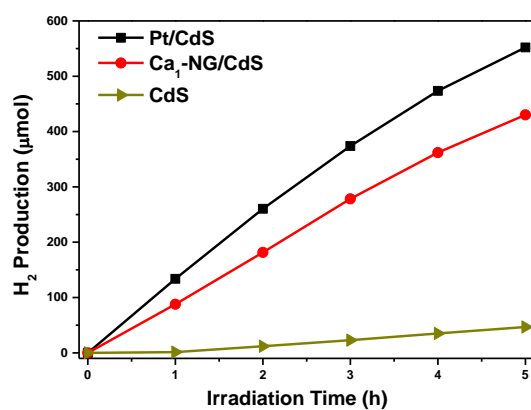

**Figure S13.** Related to Figure 4. Photocatalytic H<sub>2</sub> evolution of pure CdS, 0.5 wt.% Ca<sub>1</sub>-NG/CdS and 0.5 wt.% Pt/CdS photocatalysts.

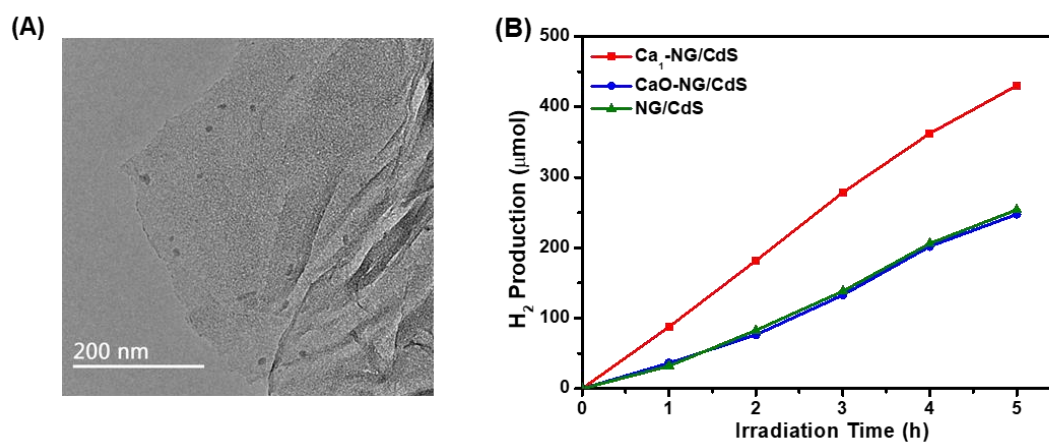

**Figure S14.** Related to Figure 4. (A) TEM images of CaO-NG; (B) Photocatalytic H<sub>2</sub> evolution of 0.5 wt.% NG/CdS, 0.5 wt.% CaO-NG/CdS and 0.5 wt.% Ca<sub>1</sub>-NG/CdS.



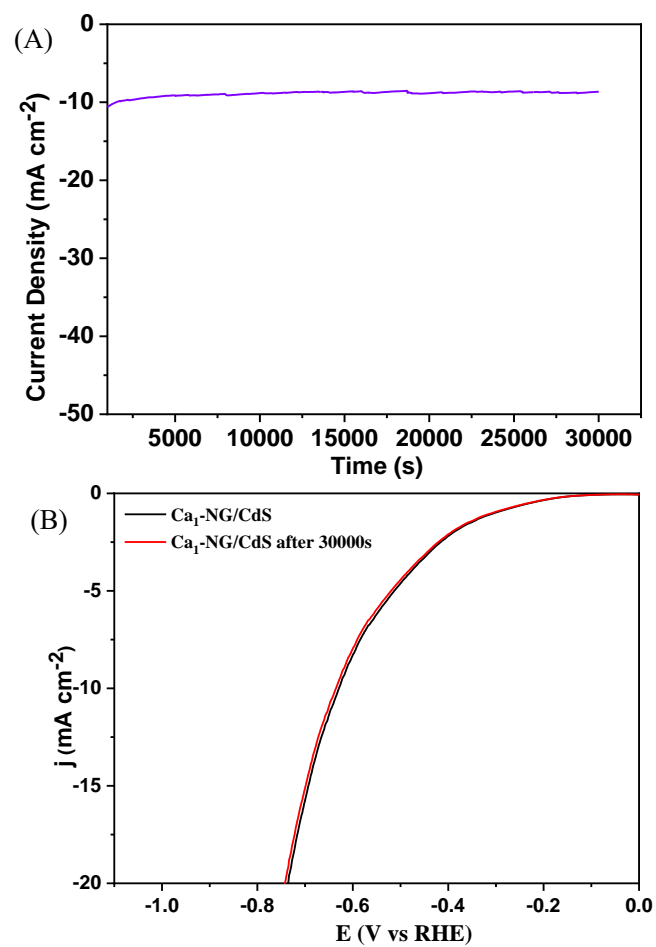

**Figure S15. Related to Figure 4.** (A) Time dependence of current density at -0.6 V (vs. RHE) and (B) the polarization curves of Ca<sub>1</sub>-NG/CdS measured in 0.5 M H<sub>2</sub>SO<sub>4</sub> solution before and after a 30,000 seconds stability test.

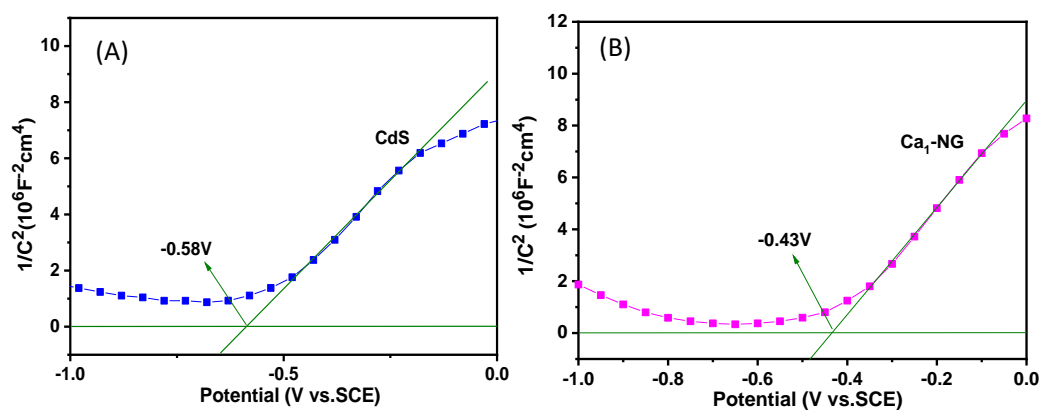

**Figure S16.** Related to Figure 5. Mott-Schottky plots of CdS and Ca<sub>1</sub>-NG can be estimated as -0.58 V and -0.43 V vs. SCE, respectively.

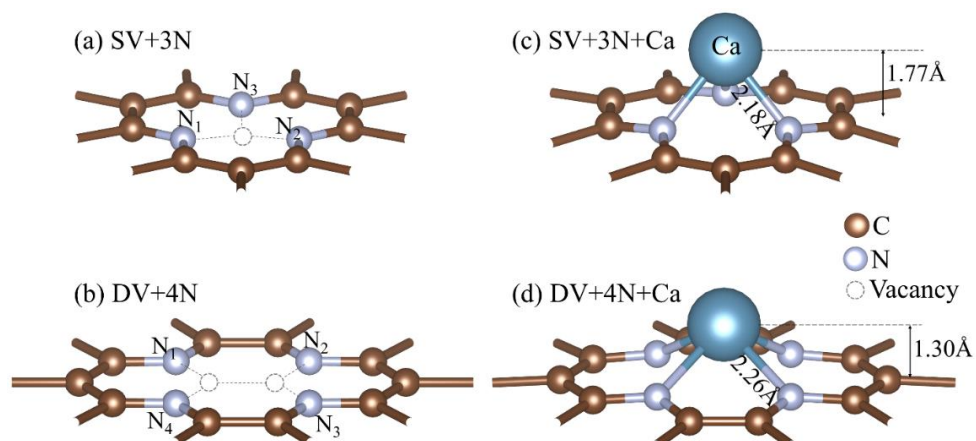

**Figure S17. Related to Figure 6.** Atomic structures of graphene with (a) a single vacancy + 3 pyridinic-N (SV+3N), or (b) a double vacancy + 4 pyridinic-N (DV+4N), or (c) a SV+3N plus Ca, or (d) a DV+4N plus Ca. The N atoms are symmetric around a central axis. The Ca atom is on the central axis and around 1.3~1.8 Å above the 2D plane, forming three/four identical N-Ca bonds.

**Table S1.** XPS data fitting results for Ca<sub>1</sub>-NG cocatalyst. **Related to Figure 2.**

| <b>Element</b> | <b>Peaks</b>         | <b>Binding Energy (eV)</b> | <b>FWHM (eV)</b> | <b>Area</b> |
|----------------|----------------------|----------------------------|------------------|-------------|
| N              | Pyridinic N          | 398.0                      | 1.7              | 12236.9     |
|                | Pyrrolic N           | 399.5                      | 1.6              | 6023.4      |
|                | Graphitic N          | 400.8                      | 1.8              | 5369.4      |
|                | Oxidized N           | 402.1                      | 1.8              | 1368.7      |
| Ca             | Ca 2p <sub>3/2</sub> | 347.2                      | 2.4              | 5548.3      |
|                | Ca 2p <sub>1/2</sub> | 350.8                      | 2.3              | 3358.6      |

**Table S2.** EXAFS data fitting results for Ca<sub>1</sub>-NG cocatalyst. **Related to Figure 3.**

| <b>Shell</b> | <b>N</b>    | <b><math>\Delta E</math> (eV)</b> | <b>100 x R (<math>\text{\AA}</math>)</b> | <b>10<sup>3</sup> x <math>\sigma^2</math> (<math>\text{\AA}^2</math>)</b> | <b>R-factor</b> |
|--------------|-------------|-----------------------------------|------------------------------------------|---------------------------------------------------------------------------|-----------------|
| Ca-N         | 2.82 (0.64) | 13.59 (2.43)                      | 241.4 (2.30)                             | 0.13 (2.69)                                                               | 0.035           |

**Table S3.** Summary of hydrogen evolution rates and quantum efficiencies for non-noble-metal based cocatalysts. **Related to Figure 4.**

| Non-Noble-Metal Cocatalyst/Photocatalyst                | Light Source                            | Sacrificial Reagent                                                 | H <sub>2</sub> Production Rate              | Quantum Efficiency | Ref.                     |
|---------------------------------------------------------|-----------------------------------------|---------------------------------------------------------------------|---------------------------------------------|--------------------|--------------------------|
| ZnIn <sub>2</sub> S <sub>4</sub> /CdS                   | 300 W xenon lamp (320 nm - 780 nm)      | 0.25 M Na <sub>2</sub> S and 0.35 M Na <sub>2</sub> SO <sub>3</sub> | 3072 μmol g <sup>-1</sup> h <sup>-1</sup>   | 15.9 % at 420 nm   | (Zhu, et al., 2020)      |
| ZnIn <sub>2</sub> S <sub>4</sub> -MoS <sub>2</sub> /CdS | 300 W xenon lamp (> 420 nm)             | 10 vol.% TEOA                                                       | 7570.4 μmol g <sup>-1</sup> h <sup>-1</sup> | 30.4 % at 420 nm   | (Wang, et al., 2020)     |
| Mo <sub>2</sub> C/CdS                                   | xenon lamp (> 420 nm)                   | 20 vol.% LA                                                         | 7.7 mmol g <sup>-1</sup> h <sup>-1</sup>    | 86 % at 460 nm     | (Ruan, et al., 2020)     |
| SnS <sub>2</sub> /CdS                                   | 150 W xenon lamp with an AM 1.5G filter | 20 vol.% LA                                                         | 20.2 mmol g <sup>-1</sup> h <sup>-1</sup>   | N/A                | (Rangappa, et al., 2020) |
| Ni NPs/Ni doped CdS                                     | 300 W xenon lamp (> 400 nm)             | Lactic acid                                                         | 20.6 mmol g <sup>-1</sup> h <sup>-1</sup>   | 37.5 % at 420 nm   | (Zhang, et al., 2020)    |
| FeP/ CdS                                                | 300 W xenon lamp (> 420 nm)             | 10 vol% lactic acid                                                 | 11.12 mmol g <sup>-1</sup> h <sup>-1</sup>  | 18.6 % at 450 nm   | (Sun, et al., 2020)      |
| NiCo <sub>2</sub> S <sub>4</sub> /CdS                   | 300 W xenon lamp (> 400 nm)             | Lactic acid                                                         | 20.0 mmol g <sup>-1</sup> h <sup>-1</sup>   | N/A                | (Li, et al., 2019)       |
| CoPe@GO/CdS                                             | LED lamp (< 450 nm)                     | 0.35 M Na <sub>2</sub> S and 0.25 M Na <sub>2</sub> SO <sub>3</sub> | 29.4 mmol g <sup>-1</sup> h <sup>-1</sup>   | N/A                | (Hu, et al., 2019)       |
| NiSe/CdS                                                | 300 W xenon lamp (> 420 nm)             | 0.75 M Na <sub>2</sub> S and 1.05 M Na <sub>2</sub> SO <sub>3</sub> | 170 mmol g <sup>-1</sup> h <sup>-1</sup>    | 12 % at 420 nm     | (Irfan, et al., 2019)    |
| ReS <sub>2</sub> /CdS                                   | 300 W xenon lamp (> 420 nm)             | 10 vol% lactic acid                                                 | 137.5 mmol g <sup>-1</sup> h <sup>-1</sup>  | 53.6 % at 420 nm   | (Ye, et al., 2019)       |
|                                                         |                                         | Na <sub>2</sub> S and Na <sub>2</sub> SO <sub>3</sub>               | 24.36 mmol g <sup>-1</sup> h <sup>-1</sup>  | 6.02 % at 420 nm   |                          |
| CdS/g-C <sub>3</sub> N <sub>4</sub>                     | 300 W xenon lamp (> 420 nm)             | 10 vol% lactic acid                                                 | 2537 μmol g <sup>-1</sup> h <sup>-1</sup>   | 3.41 % at 420 nm   | (Chen, et al., 2019)     |
| P-MoS <sub>2</sub> /CdS                                 | 300 W xenon                             | 0.35 M                                                              | 5.89 mmol g <sup>-1</sup> h <sup>-1</sup>   | 19.0 % at 420      | (Xu, et al., 2019)       |

|                                        |                                           |                                                              |                                             |                  |                            |
|----------------------------------------|-------------------------------------------|--------------------------------------------------------------|---------------------------------------------|------------------|----------------------------|
|                                        | lamp (> 420 nm)                           | Na <sub>2</sub> S and 0.25 M Na <sub>2</sub> SO <sub>3</sub> | <sup>1</sup>                                | nm               |                            |
| Co <sub>2</sub> P/CdS                  | 300 W metal halide lamp (420 nm - 780 nm) | 10 vol% lactic acid                                          | 66.98 mmol g <sup>-1</sup> h <sup>-1</sup>  | 2.26 % at 700 nm | (Li, et al., 2019)         |
| H <sub>0.53</sub> WO <sub>3</sub> /CdS | 300 W xenon lamp (> 420 nm)               | 10 vol% lactic acid                                          | 2.94 mmol g <sup>-1</sup> h <sup>-1</sup>   | N/A              | (Zhang, et al., 2019)      |
| UiO-66@CdS/WP                          | 300 W xenon lamp (> 420 nm)               | 10 vol% lactic acid                                          | 5267 μmol g <sup>-1</sup> h <sup>-1</sup>   | N/A              | (Zhang, et al., 2019)      |
| Ti <sub>3</sub> C <sub>2</sub> /CdS    | 300 W xenon lamp (> 420 nm)               | 18 vol% lactic acid                                          | 14342 mmol g <sup>-1</sup> h <sup>-1</sup>  | 40.5 % at 425 nm | (Ran, et al., 2017)        |
| WS <sub>2</sub> /CdS                   | 150 W xenon lamp (> 420nm)                | Lactic acid                                                  | 185.79 mmol g <sup>-1</sup> h <sup>-1</sup> | 40.5 % at 420 nm | (Gopannagari, et al. 2017) |
| Ni-NG/CdS                              | 300 W xenon lamp (> 420 nm)               | 1.0 M (NH <sub>4</sub> ) <sub>2</sub> SO <sub>3</sub>        | 263.5 mmol g <sup>-1</sup> h <sup>-1</sup>  | 48.2 % at 420 nm | (Zhao, et al., 2018)       |
| Ca <sub>1</sub> -NG/CdS                | LED lamp (= 420 nm)                       | 1.0 M (NH <sub>4</sub> ) <sub>2</sub> SO <sub>3</sub>        | 18.4 mmol g <sup>-1</sup> h <sup>-1</sup>   | 57.5 % at 420 nm | This work                  |

**Table S4.** Ca concentration changes in 0.5 wt.% Ca<sub>1</sub>-NG/CdS before and after 15 hours' photocatalytic H<sub>2</sub> evolution. **Related to Figure 4.**

|                                                      | Before photocatalytic reaction | After photocatalytic reaction | Relative Change (%) |
|------------------------------------------------------|--------------------------------|-------------------------------|---------------------|
| Ca concentration in 0.5 wt.% Ca <sub>1</sub> -NG/CdS | 0.0026 wt.%                    | 0.0025 wt.%                   | 3.84 %              |

**Table S5.** Non-radiative ( $\tau_1$ ), radiative ( $\tau_2$ ) and average ( $\tau$ ) lifetimes of time resolved photoluminescence spectra for CdS, 0.5 wt.% NG/CdS and 0.5 wt.% Ca<sub>1</sub>-NG/CdS photocatalysts. **Related to Figure 5.**

| Photocatalyst           | $\tau_1$ (ns) | $\tau_2$ (ns) | $\tau$ (ns) |
|-------------------------|---------------|---------------|-------------|
| CdS                     | 2.31          | 25.85         | 2.37        |
| NG/CdS                  | 1.71          | 21.51         | 1.88        |
| Ca <sub>1</sub> -NG/CdS | 0.81          | 16.55         | 0.93        |
